# Supplementary material for: Geochemical Assessment of the Evolution of Groundwater under the Impact of Seawater Intrusion in the Mannar District of Sri Lanka
Source: MDPI journal article supplement (doi:10.3390/w16081137), 2024-04-17
Supplement: s1 [file s1]

# Geochemical Assessment of the Evolution of Groundwater under the Impact of Seawater Intrusion in the Mannar District of Sri Lanka

Samadhi Athauda <sup>1,2,3,†</sup>, Yunwen Wang <sup>1,†</sup>, Zhineng Hao <sup>1,2,\*</sup>, Suresh Indika <sup>1,2,3</sup>, Isuru Yapabandara <sup>1,2,3</sup>,

Sujithra K. Weragoda <sup>3,4</sup>, Jingfu Liu <sup>5</sup> and Yuansong Wei <sup>1,2,3,\*</sup>

<sup>1</sup> Research Center for Eco-Environmental Sciences, Chinese Academy of Sciences, Beijing 100085, China; athaudasamadhi@yahoo.com (S.A.); yunwwang@163.com (Y.W.); indika\_st@rcees.ac.cn (S.I.); yapaban@gmail.com (I.Y.)

<sup>2</sup> University of Chinese Academy of Sciences, Beijing 100049, China

<sup>3</sup> China-Sri Lanka Joint Research and Demonstration Center for Water Technology, Ministry of Water Supply, Meewathura, Peradeniya 20400, Sri Lanka; skwera7@gmail.com

<sup>4</sup> National Water Supply and Drainage Board, Katugastota 20800, Sri Lanka

<sup>5</sup> Institute of Environment and Health, Jiangnan University, Wuhan 430056, China; jfliu@rcees.ac.cn

\* Correspondence: znhao@rcees.ac.cn (Z.H.); yswei@rcees.ac.cn (Y.W.)

† These authors contributed equally to this work.

**NO. OF FIGURES: 4**

**NO. OF TABLES: 3**

**NO. OF PAGES: 9**

### **Text 1. Calculation of water parameters**

The categorization of water hardness is based on  $\text{CaCO}_3$  equivalents, where soft water registers below 75 mg/L as  $\text{CaCO}_3$ . Slightly hard water falls within the range of 75 to 150 mg/L as  $\text{CaCO}_3$ , while moderately hard water encompasses concentrations between 150 and 300 mg/L as  $\text{CaCO}_3$ . Water is classified as very hard when the values surpass 300 mg/L as  $\text{CaCO}_3$ , according to the classification by Sawyer and McCarty in 1967 [1].

The calculation of hardness is based on the following equation in equivalent of  $\text{CaCO}_3$  mg/L.

$$\text{Hardness [mg/L]} = 2.497 [\text{Ca, mg/L}] + 4.118 [\text{Mg, mg/L}]$$

Alkalinity is the acid-neutralizing capacity due to the presence of  $\text{HCO}_3^-$ ,  $\text{CO}_3^{2-}$  and hydroxide  $\text{OH}^-$  ions of the water. The total alkalinity was determined by  $\text{H}_2\text{SO}_4$  (0.01N) titration with methyl orange as the indicator.  $[\text{HCO}_3^-]$  is calculated using the following equation.

$$[\text{HCO}_3^-] = 1.22 \times (\text{Total Alkalinity/mg/L})$$

The concentrations in terms of milliequivalents per liter (meq/L) is used to measure the chemical activity of ions in a solution, providing a standardized approach to convey the quantity of substances involved in various chemical reactions.

$$\text{meq} = \frac{\text{mg} \times \text{Valence}}{\text{Molecular weight}}$$

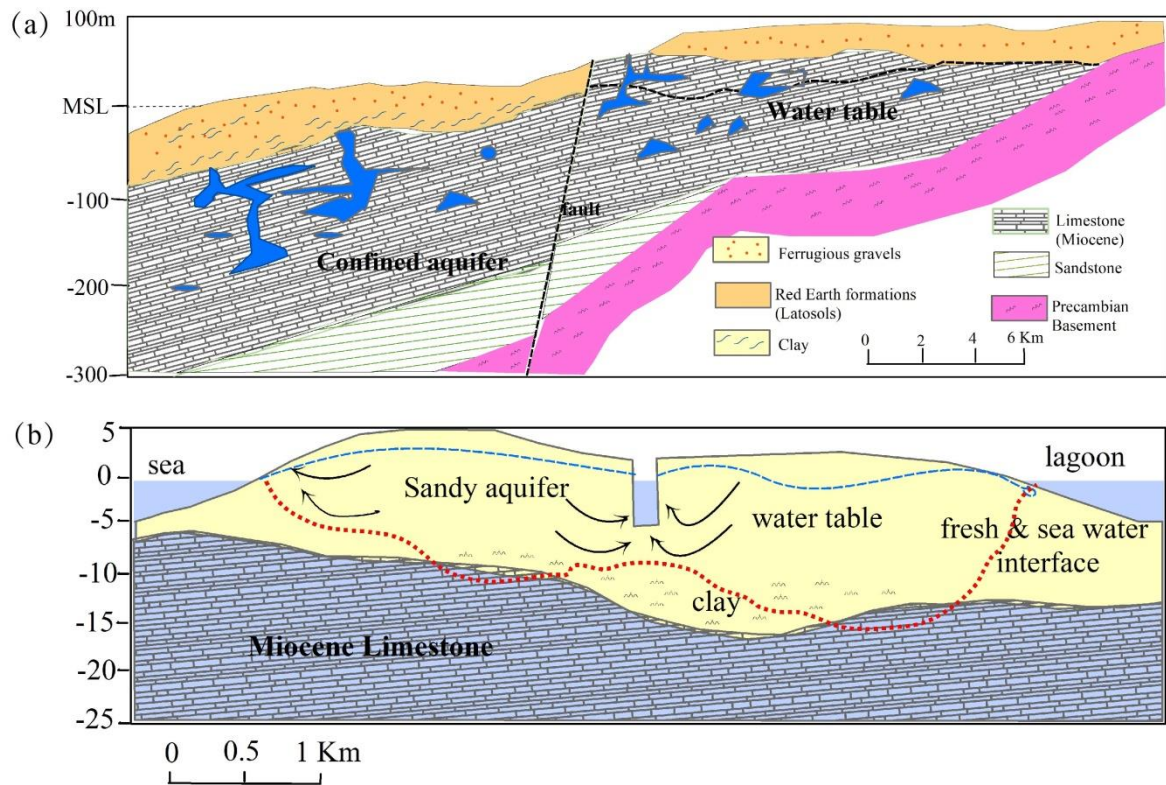

**Figure S1.** East-West geological schematic cross sections of (a) deep confined aquifer basin system of Mannar mainland [2] and (b) sandy aquifer systems of Mannar Island [3]

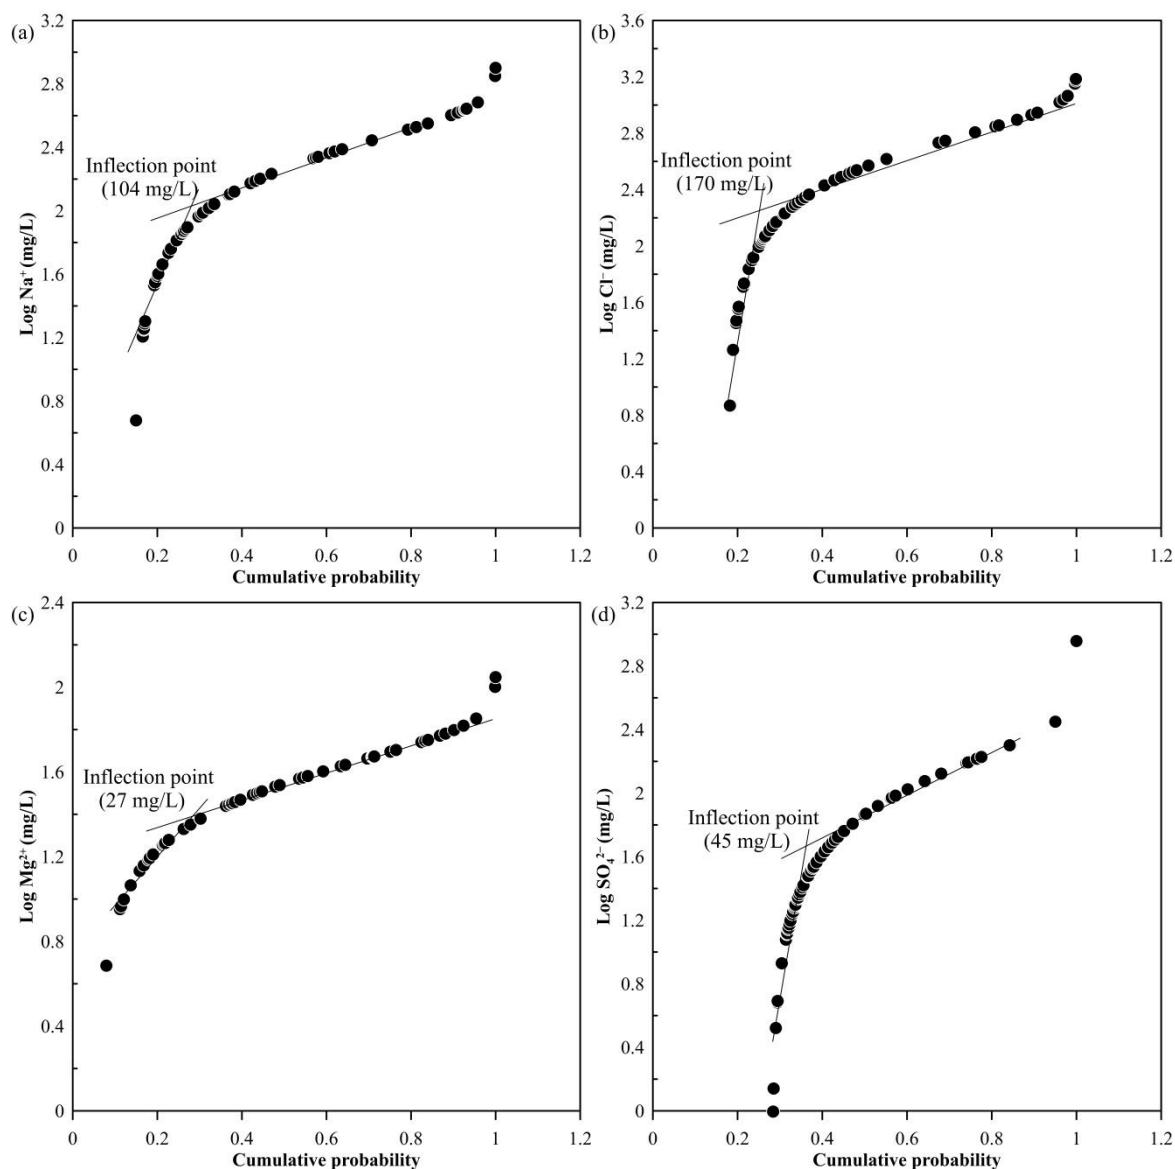

**Figure S2.** Cumulative probability (%) for calculating the threshold value of critical parameters ( $\text{Na}^+$ ,  $\text{Mg}^{2+}$ ,  $\text{Cl}^-$ ,  $\text{SO}_4^{2-}$ )

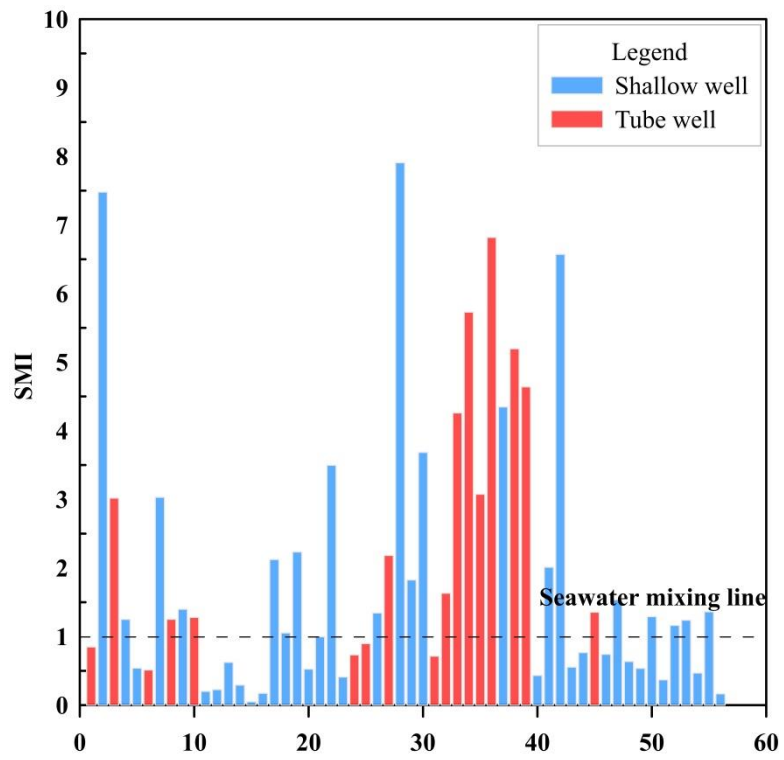

**Figure S3.** SMI values of groundwater in Mannar district.

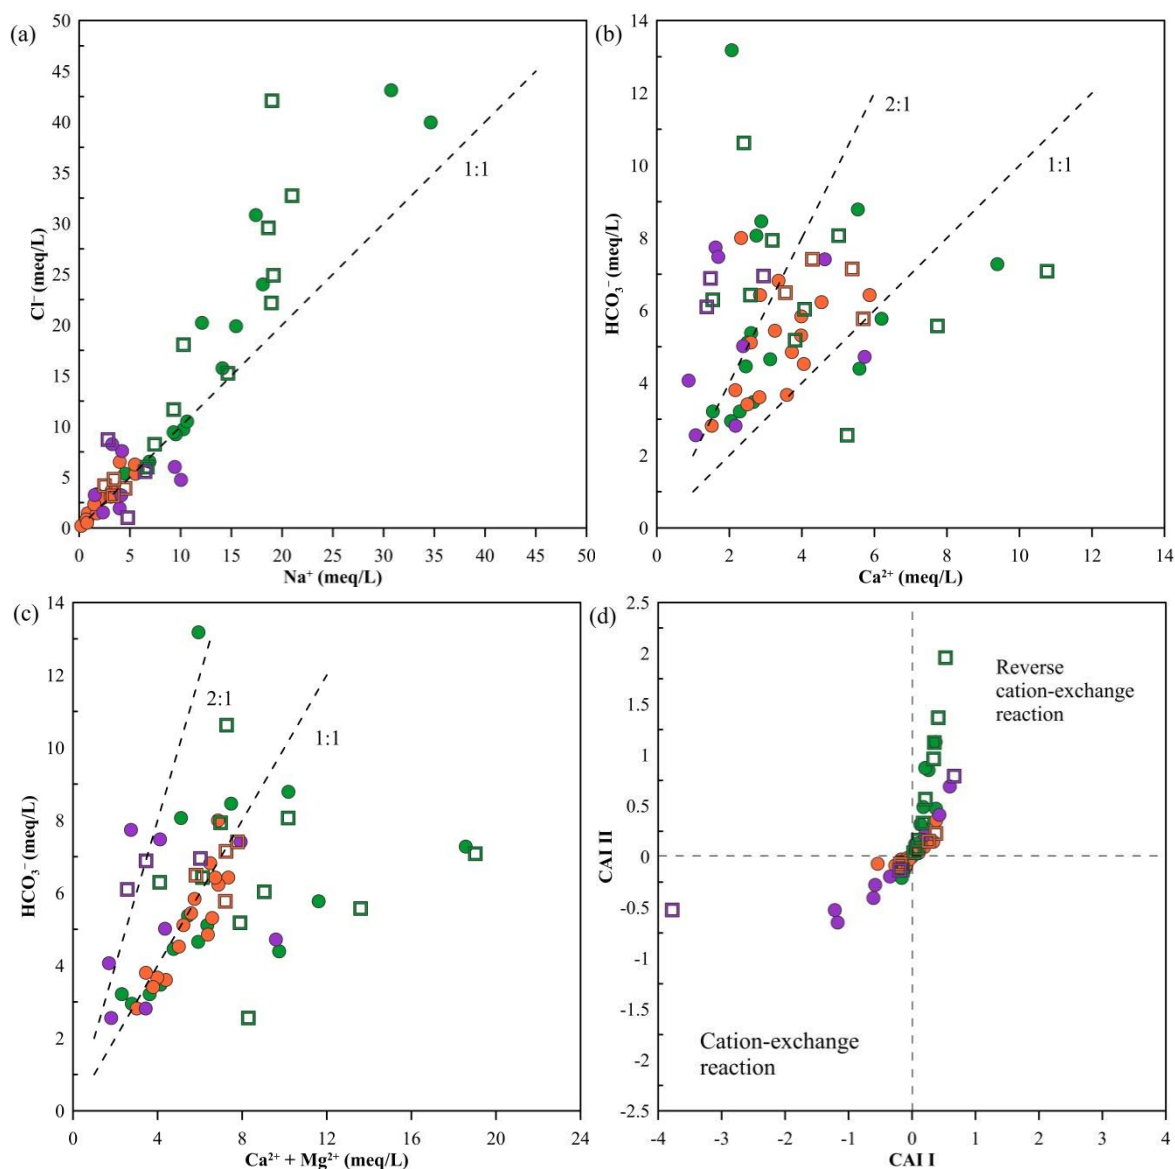

**Figure S4:** Hydrochemical relationships between ions. Orange, green, and purple colors represent HCO<sub>3</sub>-Ca type, Cl-Na type, and Mixed type, respectively. Solid and hollow points correspond to shallow well and tube well groundwater, respectively. (a)  $\text{Cl}^-$  vs  $\text{Na}^+$ . (b)  $\text{HCO}_3^-$  vs  $\text{Ca}^{2+}$ . (c)  $\text{HCO}_3^-$  vs  $(\text{Ca}^{2+} + \text{Mg}^{2+})$ . (d) chloro-alkaline index diagram CAI II vs CAI I.

**Table S1.** The statistic of groundwater geochemical compositions.

| Indices                       | Unit  | Minimum | Maximum | Average | SLS<br>614-<br>2013 | WHO<br>2017 |
|-------------------------------|-------|---------|---------|---------|---------------------|-------------|
| pH                            |       | 5.89    | 7.97    | 6.82    | 6.5 - 8.5           | 6.5 - 8.5   |
| Temperature                   | °C    | 27.3    | 28.2    | 27.6    | -                   | -           |
| EC                            | µS/cm | 384     | 5910    | 1787    | 750                 | 750         |
| TDS                           | mg/L  | 192     | 2950    | 894     | 500                 | 500         |
| Na <sup>+</sup>               | mg/L  | 4.77    | 797.00  | 184.03  | 250                 | 200         |
| K <sup>+</sup>                | mg/L  | 0.29    | 68.01   | 15.24   | -                   | -           |
| Mg <sup>2+</sup>              | mg/L  | 4.85    | 111.55  | 35.07   | -                   | -           |
| Ca <sup>2+</sup>              | mg/L  | 17.54   | 215.23  | 70.72   | -                   | -           |
| HCO <sub>3</sub> <sup>-</sup> | mg/L  | 156     | 804     | 354     | 200                 | -           |
| F <sup>-</sup>                | mg/L  | 0.14    | 2.48    | 0.69    | 1.0                 | 1.5         |
| Cl <sup>-</sup>               | mg/L  | 7.38    | 1530.69 | 369.54  | 250                 | 250         |
| Br <sup>-</sup>               | mg/L  | <0.01   | 5.5     | 1.2     | -                   | 2           |
| NO <sub>3</sub> <sup>-</sup>  | mg/L  | <0.01   | 85.6    | 8.1     | 50                  | 50          |
| SO <sub>4</sub> <sup>2-</sup> | mg/L  | 0.99    | 906.70  | 73.19   | 200                 | 200         |
| Total Hardness                | mg/L  | 84.8    | 950.8   | 321.0   | 250                 | -           |
| DOC                           | mg/L  | 0.59    | 15.16   | 5.82    | -                   | -           |

**Table S2.** Relative weight of chemical parameters with threshold values.

| Parameter                     | Threshold values (S <sub>i</sub> ) | Weight (w <sub>i</sub> ) | Relative Weight (W <sub>i</sub> ) |
|-------------------------------|------------------------------------|--------------------------|-----------------------------------|
| pH                            | 6.5–8.5                            | 4                        | 0.105263                          |
| Dissolved oxygen              | 5                                  | 5                        | 0.131579                          |
| Total Dissolved solids        | 500                                | 4                        | 0.105263                          |
| Alkalinity                    | 200                                | 2                        | 0.052632                          |
| Electrical conductivity       | 750                                | 5                        | 0.131579                          |
| Na <sup>+</sup>               | 200                                | 1                        | 0.026316                          |
| Ca <sup>2+</sup>              | 75                                 | 2                        | 0.052632                          |
| Mg <sup>2+</sup>              | 50                                 | 2                        | 0.052632                          |
| F <sup>-</sup>                | 1.5                                | 2                        | 0.052632                          |
| Cl <sup>-</sup>               | 250                                | 3                        | 0.078947                          |
| SO <sub>4</sub> <sup>2-</sup> | 200                                | 4                        | 0.105263                          |
| NO <sub>3</sub> <sup>-</sup>  | 50                                 | 4                        | 0.105263                          |
|                               |                                    | $\sum w_i=38$            | $\sum W_i=1.0000$                 |



**Table S3.** Sub-stages (in %) in freshening and intrusion phases

|                  | HF <sub>s</sub>                                                                            | Sub-stage           | Cation<br>exchange<br>evaluation | Percentages<br>(%) | Percentages<br>(%) |
|------------------|--------------------------------------------------------------------------------------------|---------------------|----------------------------------|--------------------|--------------------|
| Shallow<br>wells | NaCl                                                                                       | f <sub>1</sub>      |                                  | 15.4               |                    |
|                  | NaMixCl                                                                                    | f <sub>2</sub>      |                                  | 5.1                |                    |
|                  | NaMixHCO <sub>3</sub> ,<br>MixNaMixHCO <sub>3</sub>                                        | f <sub>3</sub>      | freshening                       | 5.1                | 74.36              |
|                  | NaHCO <sub>3</sub> , CaHCO <sub>3</sub> ,<br>MixNaHCO <sub>3</sub> , MixCaHCO <sub>3</sub> | f <sub>4</sub> + FW |                                  | 48.8               |                    |
|                  | MixNaMixCl, MixCaMixCl                                                                     | i <sub>2</sub>      |                                  | 5.1                |                    |
|                  | MixNaCl, MixCaCl                                                                           | i <sub>3</sub>      | intrusion                        | 5.1                | 25.64              |
|                  | NaCl                                                                                       | i <sub>4</sub> + SW |                                  | 15.4               |                    |
| Tube<br>wells    | NaCl                                                                                       | f <sub>1</sub>      |                                  | 23.4               |                    |
|                  | NaMixHCO <sub>3</sub>                                                                      | f <sub>3</sub>      | freshening                       | 6.0                | 64.7               |
|                  | NaHCO <sub>3</sub> , CaHCO <sub>3</sub> ,<br>MixNaHCO <sub>3</sub> , MixCaHCO <sub>3</sub> | f <sub>4</sub> + FW |                                  | 35.3               |                    |
|                  | NaCl                                                                                       | i <sub>4</sub> + SW | intrusion                        | 35.3               | 35.3               |

## References

1. Sawyer CN. *Chemistry for Sanitary Engineers*. McGraw-Hill; 1967.  
<https://books.google.lk/books?id=hj9RAAAAMAAJ>
2. Davies J, Selvarathnam R. The groundwater resources of the Murunkan area. North-West Land Water Resources Development Project Sri Lanka. Water Resources Board, Groundwater Division, Colombo, 1982.
3. Perera APGRL. GROUNDWATER RESOURCES OF SRI LANKA. Published online 2005:0-28.
